# Supplementary material
Source: Springer Nature journal article supplement (https://www.springermedizin.de/resource/supplementary/13058_2013_3420_MOESM14_ESM.pdf/9704130)

**A****PHBEC**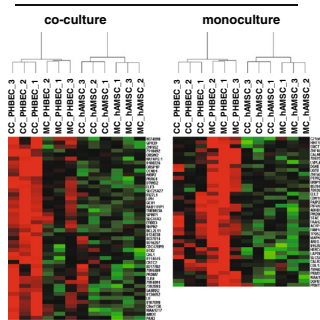**hAMSC**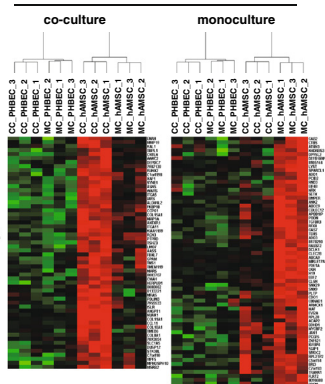**B****hAMSC specific genes**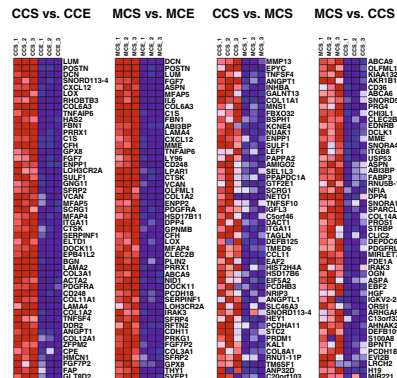**C**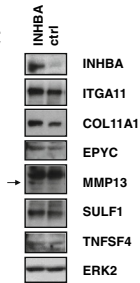**D**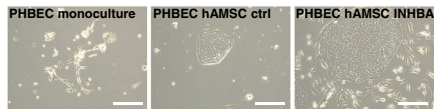**E**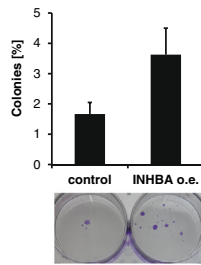

Supplement: MOESM14 [file 9704130]
